# Supplementary material
Source: PubMed Central journal article supplement (PMC4787527)
Supplement: lacm617837.wt1_default.pdf [file lacm617837.wt1_default.pdf]

Example of calculations of outcome continuous variables in a patient

| Locations                               | Preoperative visit (V0) |        |      |      | 12 month follow-up (V5) |        |       |        | Difference<br>V5 - V0 |         |
|-----------------------------------------|-------------------------|--------|------|------|-------------------------|--------|-------|--------|-----------------------|---------|
|                                         | A0                      | U0     | D0   | R0   | A5                      | U5     | D5    | R5     | D5-D0                 | R5-R0   |
| 20 cm                                   |                         |        |      |      |                         |        |       |        |                       |         |
| 15 cm                                   | 35                      | 34.8   | 0.2  | 101% | 39                      | 39     | 0.0   | 100%   | -0.2                  | -0.6%   |
| 10 cm                                   | 33                      | 33     | 0.0  | 100% | 38                      | 36     | 2.0   | 106%   | 2.0                   | 5.6%    |
| 5 cm                                    | 31                      | 30     | 1.0  | 103% | 35                      | 33.5   | 1.5   | 104%   | 0.5                   | 1.1%    |
| Elbow fold                              | 26.2                    | 26.5   | -0.3 | 99%  | 29                      | 28     | 1.0   | 104%   | 1.3                   | 4.7%    |
| 5 cm                                    | 27                      | 27     | 0.0  | 100% | 29.5                    | 28.5   | 1.0   | 104%   | 1.0                   | 3.5%    |
| 10 cm                                   | 24                      | 24     | 0.0  | 100% | 26                      | 26     | 0.0   | 100%   | 0.0                   | 0.0%    |
| 15 cm                                   | 19.5                    | 20.2   | -0.7 | 97%  | 22                      | 21     | 1.0   | 105%   | 1.7                   | 8.2%    |
| 20 cm                                   | 16.5                    | 17.5   | -1.0 | 94%  | 19                      | 17.5   | 1.5   | 109%   | 2.5                   | 14.3%   |
| 25 cm                                   |                         |        |      |      |                         |        |       |        |                       |         |
| Hand                                    | 18.5                    | 18.2   | 0.3  | 102% | 19.5                    | 19.5   | 0.0   | 100%   | -0.3                  | -1.6%   |
| Maximum difference at 2 adjacent points |                         |        | 0.0  |      |                         |        | 1.5   |        | 1.7(a)                |         |
| Volumes                                 | 2052.6                  | 2050.6 | 2.0  | 100% | 2573.3                  | 2399.4 | 173.9 | 107.2% | 171.9                 | 7.2%(b) |

Measurements in each arm: **Locations:** Circumferences of the arm are taken at these locations from the elbow; **AX.** = Measurements on affected arm in visit “X”; **UX.** = Measurements on unaffected arm in visit “X”; **DX.** = Difference AX – UX; **RX** = Ratio AX / UX; **Volumes:** Hands are excluded from the computation of volumes.

**Main outcome** is based in these variables: **(a) M2CD5** = Maximum difference at two adjacent points in the inter-limb circumferential difference **(b) CVR** = Change (difference) in Volume Ratio.
